# Supplementary material
Source: MDPI journal article supplement (https://www.mdpi.com/2071-1050/15/1/488)
Supplement: s1 [file s1]

**Table S1.** Primer sets used for qPCR and amplicon metagenomic sequencing used in this study.

| Target Gene                            | Primer Set       | Sequence                                                 | Reference                   |
|----------------------------------------|------------------|----------------------------------------------------------|-----------------------------|
| <i>qPCR</i>                            |                  |                                                          |                             |
| 16S rRNA gene                          | 338F/534R        | 5'-CCTACGGGAGGCAGCAG-3'<br>5'-ATTACCGCGGCTGCTGG-3'       | Fierer et al., 2005 [51]    |
| 18S rRNA gene                          | SSU 1536/Fu 1851 | 5'-ATTGCAATGCMCTATCCCCA-3'<br>5'-GGAAACTCACCAGGTCCAGA-3' | May et al., 2001 [52]       |
| <i>Amplicon metagenomic sequencing</i> |                  |                                                          |                             |
| 16S rRNA gene V3-V4 regions            | 341F/806R        | 5'-CCTAYGGRBGCASCAG-3'<br>5'-GGACTACNNGGTATCTAAT-3'      | Youngseob et al., 2005 [50] |

**Table S2.** Trimming summary showing the number of initial reads, reads that pass quality control, reads after denoising step, number of sequences after merging them by their 3', and the resulting non-chimeric sequences. B1 = *B. brizantha*/common bean; B2 = *B. brizantha*/*B. brizantha*/common bean; BM = common bean monoculture.

| SampleID | Input  | Filtered | Denoised | Merged | Non-chimeric |
|----------|--------|----------|----------|--------|--------------|
| B1R1     | 165020 | 147973   | 139116   | 92732  | 76709        |
| B1R2     | 178822 | 159876   | 150726   | 103001 | 85990        |
| B1R3     | 169349 | 151352   | 141919   | 93990  | 77698        |
| B2R1     | 152487 | 136318   | 127823   | 85112  | 70278        |
| B2R2     | 153882 | 137960   | 129386   | 81468  | 65603        |
| B2R3     | 189425 | 169670   | 161051   | 115451 | 97005        |
| BMR1     | 175579 | 157715   | 148189   | 97811  | 79653        |
| BMR2     | 181736 | 163465   | 153122   | 102363 | 84574        |
| BMR3     | 180370 | 162266   | 152793   | 103298 | 84912        |

**Table S3.** Mean relative abundance of the 20 most abundant bacterial phyla in the three rhizospheric samples: B1 = *B. brizantha*/common bean; B2 = *B. brizantha*/*B. brizantha*/common bean; BM = common bean monoculture.

| Phylum             | B1           | B2           | BM           |
|--------------------|--------------|--------------|--------------|
| Actinobacteriota   | 30.34 ± 0.51 | 31.84 ± 1.51 | 32.36 ± 3.07 |
| Proteobacteria     | 27.48 ± 2.09 | 25.60 ± 1.96 | 26.12 ± 3.64 |
| Acidobacteriota    | 9.02 ± 0.85  | 8.45 ± 0.35  | 7.28 ± 1.04  |
| Chloroflexi        | 6.12 ± 0.98  | 7.35 ± 1.3   | 7.09 ± 0.72  |
| Myxococcota        | 7.21 ± 0.74  | 5.89 ± 0.28  | 7.05 ± 0.18  |
| Gemmatimonadota    | 5.99 ± 0.30  | 5.10 ± 0.17  | 5.64 ± 0.65  |
| Bacteroidota       | 3.56 ± 0.19  | 3.37 ± 0.54  | 3.51 ± 1.29  |
| Firmicutes         | 2.84 ± 0.29  | 4.08 ± 0.46  | 2.99 ± 0.62  |
| Crenarchaeota      | 2.32 ± 1.48  | 2.82 ± 0.80  | 2.79 ± 1.26  |
| Verrucomicrobiota  | 1.54 ± 0.14  | 1.97 ± 0.63  | 1.38 ± 0.34  |
| Entothaeonellaeota | 0.63 ± 0.16  | 0.91 ± 0.06  | 0.61 ± 0.14  |
| Desulfobacterota   | 0.68 ± 0.12  | 0.47 ± 0.19  | 0.56 ± 0.23  |
| Nitrospirota       | 0.54 ± 0.14  | 0.44 ± 0.08  | 0.41 ± 0.06  |
| Cyanobacteria      | 0.20 ± 0.10  | 0.30 ± 0.28  | 0.57 ± 0.72  |
| Methylomirabilota  | 0.39 ± 0.05  | 0.31 ± 0.04  | 0.24 ± 0.04  |
| Bdellovibrionota   | 0.24 ± 0.03  | 0.18 ± 0.04  | 0.27 ± 0.13  |
| Planctomycetota    | 0.14 ± 0.05  | 0.19 ± 0.10  | 0.25 ± 0.17  |
| Patescibacteria    | 0.10 ± 0.06  | 0.16 ± 0.09  | 0.10 ± 0.04  |
| Armatimonadota     | 0.11 ± 0.03  | 0.07 ± 0.03  | 0.13 ± 0.03  |
| NB1-j              | 0.13 ± 0.11  | 0.08 ± 0.02  | 0.07 ± 0.03  |

**Table S4.** Mean relative abundance of the 20 most abundant bacterial families in the three rhizospheric samples: B1 = *B. brizantha*/common bean; B2 = *B. brizantha*/*B. brizantha*/common bean; BM = common bean monoculture.

| Family               | B1          | B2          | BM          |
|----------------------|-------------|-------------|-------------|
| Gemmatimonadaceae    | 4.89 ± 0.29 | 4.33 ± 0.13 | 4.62 ± 0.56 |
| Micromonosporaceae   | 4.04 ± 0.22 | 4.53 ± 0.85 | 4.65 ± 0.58 |
| Roseiflexaceae       | 2.86 ± 0.64 | 3.91 ± 1.06 | 3.07 ± 0.39 |
| 67-14                | 3.00 ± 0.27 | 3.24 ± 0.17 | 3.02 ± 0.35 |
| Beijerinckiaceae     | 2.71 ± 0.32 | 2.39 ± 0.14 | 3.90 ± 0.37 |
| Bacillaceae          | 2.36 ± 0.23 | 3.58 ± 0.47 | 2.51 ± 0.55 |
| Sphingomonadaceae    | 2.85 ± 0.18 | 2.49 ± 0.17 | 2.83 ± 0.73 |
| Nitrososphaeraceae   | 2.32 ± 1.48 | 2.82 ± 0.80 | 2.79 ± 1.26 |
| Xanthobacteraceae    | 2.35 ± 0.03 | 2.67 ± 0.23 | 2.00 ± 0.27 |
| Solirubrobacteraceae | 2.09 ± 0.08 | 2.25 ± 0.15 | 2.60 ± 0.48 |
| Azospirillaceae      | 2.30 ± 0.25 | 2.00 ± 0.07 | 2.22 ± 0.29 |
| Pyrinomonadaceae     | 2.52 ± 0.29 | 2.37 ± 0.36 | 1.42 ± 0.29 |
| Rhizobiaceae         | 2.28 ± 0.65 | 2.16 ± 0.91 | 1.58 ± 0.22 |
| Nocardiodaceae       | 1.99 ± 0.41 | 2.00 ± 0.16 | 2.00 ± 0.65 |
| Pseudonocardiaceae   | 1.90 ± 0.10 | 2.20 ± 0.05 | 1.80 ± 0.25 |
| Comamonadaceae       | 2.02 ± 0.30 | 1.69 ± 0.17 | 1.69 ± 0.24 |
| Myxococcaceae        | 1.72 ± 0.29 | 1.31 ± 0.09 | 1.99 ± 0.47 |
| Chitinophagaceae     | 1.65 ± 0.03 | 1.53 ± 0.22 | 1.55 ± 0.57 |
| Micrococcaceae       | 1.48 ± 0.14 | 1.28 ± 0.18 | 1.90 ± 0.51 |
| Rubrobacteriaceae    | 1.45 ± 0.15 | 1.48 ± 0.05 | 1.56 ± 0.36 |

**Table S5.** Mean relative abundance of the 20 most abundant bacterial genera in the three rhizospheric samples: B1 = *B. brizantha*/common bean; B2 = *B. brizantha*/*B. brizantha*/common bean; BM = common bean monoculture.

| Genus                                              | B1          | B2          | BM          |
|----------------------------------------------------|-------------|-------------|-------------|
| 67-14                                              | 3.0 ± 0.27  | 3.24 ± 0.17 | 3.02 ± 0.35 |
| Bacillus                                           | 2.36 ± 0.23 | 3.57 ± 0.47 | 2.51 ± 0.55 |
| RB41                                               | 2.52 ± 0.29 | 2.37 ± 0.36 | 1.42 ± 0.29 |
| Microvirga                                         | 1.83 ± 0.06 | 1.68 ± 0.16 | 2.54 ± 0.10 |
| Skermanella                                        | 2.07 ± 0.23 | 1.81 ± 0.06 | 2.02 ± 0.30 |
| Sphingomonas                                       | 1.89 ± 0.15 | 1.83 ± 0.20 | 2.15 ± 0.63 |
| Solirubrobacter                                    | 1.54 ± 0.12 | 1.64 ± 0.03 | 1.77 ± 0.35 |
| Allorhizobium-Neorhizobium-Pararhizobium-Rhizobium | 1.80 ± 0.58 | 1.83 ± 0.82 | 1.24 ± 0.12 |
| Rubrobacter                                        | 1.45 ± 0.15 | 1.48 ± 0.05 | 1.56 ± 0.36 |
| Haliangium                                         | 1.47 ± 0.15 | 1.34 ± 0.23 | 1.38 ± 0.27 |
| Unknown Nitrososphaeraceae                         | 1.21 ± 0.86 | 1.56 ± 0.35 | 1.13 ± 0.52 |
| Gemmatimonas                                       | 1.08 ± 0.13 | 1.18 ± 0.07 | 1.38 ± 0.28 |
| Streptomyces                                       | 1.26 ± 0.32 | 1.24 ± 0.21 | 1.13 ± 0.14 |
| Nocardioides                                       | 1.09 ± 0.21 | 1.15 ± 0.10 | 1.32 ± 0.40 |
| Actinoplanes                                       | 0.88 ± 0.04 | 1.25 ± 0.27 | 1.37 ± 0.20 |
| Bryobacter                                         | 1.04 ± 0.10 | 1.03 ± 0.05 | 1.09 ± 0.06 |
| Unknown Vicinamibacteraceae                        | 1.16 ± 0.19 | 1.08 ± 0.09 | 0.89 ± 0.23 |
| MB-A2-108                                          | 1.01 ± 0.06 | 1.17 ± 0.07 | 0.92 ± 0.03 |
| Bradyrhizobium                                     | 0.93 ± 0.08 | 1.19 ± 0.13 | 0.81 ± 0.13 |
| IMCC26256                                          | 0.91 ± 0.04 | 1.05 ± 0.11 | 0.84 ± 0.04 |

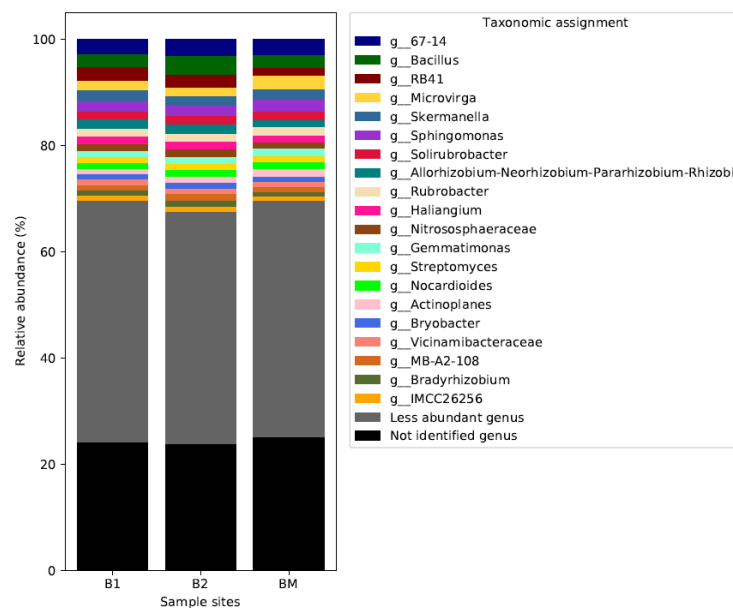

**Figure S1.** Average of relative abundance at genera taxonomic levels in the total bacterial community associated with the common bean rhizosphere under different service crop treatments: B1 = *B. brizantha*/common bean; B2 = *B. brizantha*/*B. brizantha*/common bean; BM = common bean monoculture (control). Relative abundances are based on the proportional frequencies of the ASV that could be classified at the genera levels, and are related to the total ASV identified in the samples.

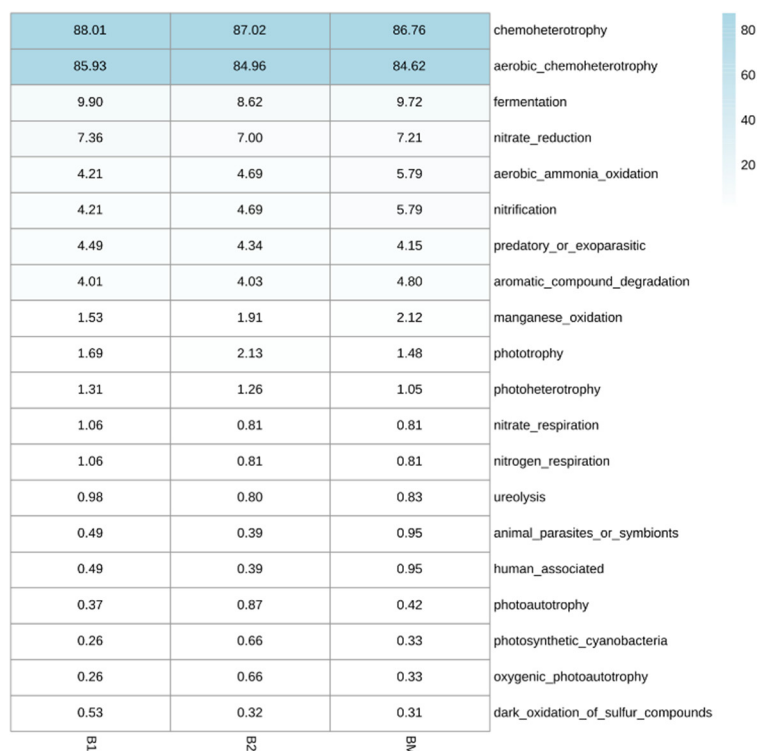

**Figure S2.** Functional groups of bacteria based on FAPROTAX database. B1 = *B. brizantha*/common bean; B2 = *B. brizantha*/*B. brizantha*/common bean; BM = common bean monoculture.
